# Supplementary material for: Analysis and Interpretation of the Impact of Missense Variants in Cancer
Source: Int J Mol Sci. 2021 May 21;22(11):5416. doi: 10.3390/ijms22115416 (PMC8196604; doi:10.3390/ijms22115416)
Supplement: Supplementary file 1 [file ijms-22-05416-s001.zip › new_supplementary_file1.xlsx]

## Sheet: new_supplementary_file1
#PROT	SMUT	PDB	MUT	RSA	FWT	FOLDX	STDEV	METASNP	DDG	DTM	CMC	CMS	PMID	TISSUE
BRCA1	M1652I	1JNXX	M1652I	0	38	0.13	0.05	0.260	1.11	NA	Other	20	20378548	meninges,lung,urinary_tract,prostate,soft_tissue
BRCA1	M1663K	1JNXX	M1663K	61	41	0.65	0.03	0.549	-0.03	NA	Other	1	20378548	prostate
BRCA1	M1663L	1JNXX	M1663L	61	41	0.45	0.01	0.416	-0.51	NA	NA	NA	20378548	NA
BRCA1	L1664P	1JNXX	L1664P	40	53	0.52	0.05	0.727	1.18	NA	NA	NA	20378548	NA
BRCA1	V1665M	1JNXX	V1665M	0	78	2.12	0.72	0.479	2.22	NA	NA	NA	20378548	NA
BRCA1	A1669S	1JNXX	A1669S	6	76	0.67	0.05	0.544	-0.16	NA	Other	2	20378548	breast
BRCA1	D1692N	1JNXX	D1692N	67	92	0.06	0.00	0.588	1.15	NA	3	1	20378548	stomach
BRCA1	R1699L	1JNXX	R1699L	23	94	-0.69	0.31	0.851	-0.99	NA	Other	2	20378548	skin
BRCA1	R1699Q	1JNXX	R1699Q	23	94	1.13	0.20	0.763	-1.83	NA	3	2	20378548	thyroid
BRCA1	R1699W	1JNXX	R1699W	23	94	1.59	0.14	0.879	2.30	-7.50	3	NA	20378548;19452558	NA
BRCA1	G1706A	1JNXX	G1706A	0	86	1.02	0.08	0.551	1.12	NA	NA	NA	20378548	NA
BRCA1	V1736A	1JNXX	V1736A	3	73	1.21	0.02	0.650	4.20	NA	NA	NA	20378548	NA
BRCA1	R1751Q	1JNXX	R1751Q	17	61	1.65	0.10	0.546	1.57	NA	Other	3	20378548	thyroid,large_intestine,NS
BRCA1	T1773S	1JNXX	T1773S	45	64	-0.41	0.01	0.522	0.48	NA	NA	NA	20378548	NA
BRCA1	M1775R	1JNXX	M1775R	7	60	4.40	0.43	0.762	5.00	-11.80	NA	NA	12096901;19452558	NA
BRCA1	D1778N	1JNXX	D1778N	61	50	0.28	0.01	0.594	0.76	NA	NA	NA	20378548	NA
BRCA1	M1783T	1JNXX	M1783T	0	57	3.57	0.07	0.652	3.73	-7.80	Other	1	20378548;19452558	breast
BRCA1	C1787S	1JNXX	C1787S	0	68	0.44	0.27	0.677	-0.37	NA	NA	NA	20378548	NA
BRCA1	G1788D	1JNXX	G1788D	32	100	7.84	0.12	0.850	3.97	NA	NA	NA	20378548	NA
BRCA1	G1788V	1JNXX	G1788V	32	100	15.18	0.07	0.760	1.84	NA	3	1	20378548	breast
BRCA1	P1806A	1JNXX	P1806A	24	55	2.06	0.09	0.298	0.06	NA	NA	NA	20378548	NA
BRCA1	V1808A	1JNXX	V1808A	0	69	3.62	0.00	0.473	2.40	NA	NA	NA	20378548	NA
BRCA1	A1843P	1JNXX	A1843P	0	88	6.23	0.01	0.730	4.89	NA	NA	NA	20378548	NA
BRCA1	Y1853C	1JNXX	Y1853C	10	100	3.67	0.02	0.786	6.04	NA	NA	NA	20378548	NA
BRD2(1)	R100L	4ALGA	R54L	32	17	-0.97	0.10	0.467	5.22	-5.80	Other	1	27403962	lung
BRD2(1)	E140K	4ALGA	E94K	37	63	1.97	0.05	0.682	3.48	-10.80	Other	1	27403962	lung
BRD2(1)	Y153H	4ALGA	Y107H	29	38	3.39	0.56	0.530	6.49	-7.00	Other	1	27403962	endometrium
BRD2(1)	D160N	4ALGA	D114N	34	28	1.22	0.02	0.546	4.10	-5.80	Other	1	27403962	ovary
BRD2(1)	D160Y	4ALGA	D114Y	34	28	1.31	0.03	0.774	4.05	-9.80	NA	NA	27403962	NA
BRD2(2)	R419W	3ONIA	R419W	34	54	1.14	0.09	0.795	0.02	-8.00	Other	1	27403962	skin
BRD2(2)	Q443H	3ONIA	Q443H	18	27	3.19	0.70	0.548	-0.89	-3.00	Other	1	27403962	large_intestine
BRD3(2)	H395R	3S92A	H395R	48	28	-0.21	0.39	0.742	-2.03	-2.60	Other	1	27403962	lung
BRD4(1)	A89V	3MXFA	A89V	4	48	1.05	0.03	0.444	-0.99	0.10	Other	1	27403962	large_intestine
BRD4(2)	A420D	2OUOA	A420D	53	46	0.47	0.03	0.580	-0.44	-3.00	Other	1	27403962	lung
PGK1	R38M	2XE7A	R38M	21	99	2.00	0.18	0.871	1.48	-1.00	NA	1	29995887	lung
PGK1	R65W	2XE7A	R65W	68	91	0.00	0.02	0.814	1.25	0.00	NA	1	29995887	liver
PGK1	G166D	2XE7A	G166D	7	85	7.20	1.45	0.847	4.10	0.50	NA	1	29995887	endometrium
PGK1	M189I	2XE7A	M189I	2	45	1.54	0.02	0.455	3.42	-2.00	NA	1	29995887	breast
PGK1	A199V	2XE7A	A199V	1	67	2.09	0.35	0.430	1.15	1.00	NA	1	29995887	breast
PGK1	V216F	2XE7A	V216F	13	92	0.89	0.44	0.742	1.84	-0.50	NA	1	29995887	breast
PGK1	F241S	2XE7A	F241S	3	37	4.56	0.05	0.726	5.27	-3.50	NA	1	29995887	breast
PIM1	Y53H	1XWSA	Y53H	36	22	1.57	0.11	0.568	3.30	NA	Other	2	23755147	large_intestine
PIM1	E124Q	1XWSA	E124Q	65	17	0.06	0.02	0.381	2.90	NA	Other	2	23755147	lung,soft_tissue
PIM1	E135K	1XWSA	E135K	73	26	-0.84	0.11	0.456	4.59	NA	Other	8	23755147	haematopoietic_and_lymphoid_tissue
PIM1	E142D	1XWSA	E142D	37	17	0.26	0.21	0.242	3.22	NA	Other	2	23755147	haematopoietic_and_lymphoid_tissue
PPARG	Q286P	1PRGA	Q286P	10	30	6.98	0.13	0.813	0.30	-1.50	NA	NA	20978130	NA
PPARG	R288H	1PRGA	R288H	26	18	0.59	0.04	0.477	-0.06	0.50	3	1	20978130	large_intestine
PPARG	V290M	1PRGA	V290M	16	24	-0.25	0.07	0.478	-0.03	0	NA	NA	28208577	NA
PPARG	R357A	1PRGA	R357A	31	28	0.04	0.02	0.595	-0.20	-1.50	NA	NA	20978130	NA
PPARG	F360L	1PRGA	F360L	5	40	1.27	0.02	0.464	0.4	-3	NA	NA	28208577	NA
PPARG	E460K	1PRGA	E460K	14	42	-1.39	0.08	0.516	0.17	-5.50	Other	1	20978130	lung
PTPRT	D927G	2OOQA	D927G	67	24	-0.11	0.02	0.657	0.24	NA	NA	4	22389709	large_intestine,prostate
PTPRT	Q987K	2OOQA	Q987K	70	8	-0.16	0.01	0.192	-4.21	NA	NA	1	22389709	large_intestine
PTPRT	N1128I	2OOQA	N1128I	44	4	-0.13	0.06	0.476	0.73	NA	NA	1	22389709	large_intestine
hFXN	D104G	1EKGA	D104G	39	46	0.33	0.00	0.556	-0.21	3.00	Other	1	31074541	liver
hFXN	A107V	1EKGA	A107V	2	23	1.23	0.06	0.119	-0.80	-3.00	Other	1	31074541	large_intestine
hFXN	F109L	1EKGA	F109L	17	15	1.60	0.07	0.148	2.09	-11.40	Other	1	31074541	endometrium
hFXN	Y123S	1EKGA	Y123S	10	22	4.47	0.08	0.198	4.92	-14.40	Other	1	31074541	upper_aerodigestive_tract
hFXN	S161I	1EKGA	S161I	34	98	-0.03	0.16	0.681	3.35	-11.00	Other	1	31074541	endometrium
hFXN	S181F	1EKGA	S181F	2	35	1.93	1.12	0.699	3.11	-11.10	Other	1	31074541	skin
hFXN	S202F	1EKGA	S202F	78	37	-0.97	0.03	0.180	0.16	-0.30	Other	2	31074541	skin
p16	D74N	1DC2A	D74N	21	95	-0.28	0.15	0.523	2.00	NA	Other	8	9917418	upper_aerodigestive_tract,thyroid,vulva,lung,breast,skin,oesophagus
p16	P81L	1DC2A	P81L	0	87	4.84	0.15	0.453	0.00	NA	Other	29	9917418	upper_aerodigestive_tract,thyroid,liver,lung,breast,skin,pancreas
p16	D84N	1DC2A	D84N	4	89	-0.06	0.59	0.486	0.10	NA	3	30	9917418	upper_aerodigestive_tract,biliary_tract,central_nervous_system,urinary_tract,lung,skin,penis,oesophagus,ovary,pancreas
p53	Q104H	2OCJA	Q104H	41	14	0.71	0.07	0.258	-0.24	NA	Other	1	9843948	adrenal_gland
p53	Q104P	2OCJA	Q104P	41	14	-1.62	0.01	0.145	-0.11	NA	NA	NA	9843948	NA
p53	T123A	2OCJA	T123A	42	76	0.34	0.10	0.369	0.13	NA	NA	NA	10654936	NA
p53	A129D	2OCJA	A129D	69	8	0.70	0.02	0.286	0.70	NA	Other	1	9843948	soft_tissue
p53	A129E	2OCJA	A129E	69	8	0.17	0.04	0.124	0.38	NA	NA	NA	9843948	NA
p53	A129S	2OCJA	A129S	69	8	0.70	0.07	0.100	0.19	NA	NA	NA	9843948	NA
p53	M133L	2OCJA	M133L	1	7	0.11	0.04	0.106	-0.30	NA	Other	2	9843948	genital_tract,large_intestine
p53	F134L	2OCJA	F134L	0	46	2.23	0.31	0.712	4.78	NA	Other	62	10713666	upper_aerodigestive_tract,large_intestine,vulva,stomach,central_nervous_system,liver,haematopoietic_and_lymphoid_tissue,biliary_tract,endometrium,oesophagus,breast,skin,lung,ovary,NS,prostate,pancreas
p53	V143A	2OCJA	V143A	0	47	3.73	0.01	0.405	3.50	NA	Other	24	10713666	upper_aerodigestive_tract,large_intestine,vulva,stomach,pleura,urinary_tract,lung,breast,skin,oesophagus,ovary,pancreas
p53	L145Q	2OCJA	L145Q	1	27	3.44	0.18	0.721	2.98	NA	Other	28	10713666	upper_aerodigestive_tract,large_intestine,stomach,pleura,oesophagus,liver,lung,ovary,pancreas,prostate,breast
p53	D148E	2OCJA	D148E	64	16	-0.15	0.03	0.156	0.43	NA	Other	5	9843948	oesophagus,haematopoietic_and_lymphoid_tissue,lung
p53	D148S	2OCJA	D148S	64	16	0.43	0.02	0.101	-0.22	NA	NA	NA	9843948	NA
p53	T150P	2OCJA	T150P	63	18	-0.70	0.01	0.138	0.08	NA	NA	NA	9843948	NA
p53	P151S	2OCJA	P151S	6	93	3.80	0.03	0.756	4.49	NA	3	139	10713666	large_intestine,vulva,peritoneum,endometrium,lung,skin,kidney,thyroid,central_nervous_system,genital_tract,oesophagus,NS,upper_aerodigestive_tract,biliary_tract,stomach,soft_tissue,urinary_tract,breast,prostate,pancreas,salivary_gland,haematopoietic_and_lymphoid_tissue,ovary,liver
p53	V157F	2OCJA	V157F	1	40	8.21	0.73	0.753	3.88	NA	2	333	10713666	large_intestine,vulva,endometrium,lung,skin,kidney,thyroid,central_nervous_system,oesophagus,NS,upper_aerodigestive_tract,biliary_tract,stomach,soft_tissue,urinary_tract,liver,prostate,pancreas,adrenal_gland,haematopoietic_and_lymphoid_tissue,thymus,ovary,bone,breast
p53	Q165K	2OCJA	Q165K	34	10	-0.75	0.07	0.201	1.27	NA	NA	NA	9843948	NA
p53	Q167E	2OCJA	Q167E	60	21	-0.33	0.09	0.171	0.43	NA	Other	1	9843948	upper_aerodigestive_tract
p53	H168R	2OCJA	H168R	28	77	0.88	0.08	0.761	2.75	NA	Other	31	10654936	large_intestine,stomach,soft_tissue,central_nervous_system,small_intestine,haematopoietic_and_lymphoid_tissue,endometrium,oesophagus,liver,lung,ovary,breast,pancreas
p53	R174K	2OCJA	R174K	33	42	0.81	0.06	0.154	0.22	NA	Other	7	9843948	central_nervous_system,haematopoietic_and_lymphoid_tissue,lung,liver,skin,breast
p53	R175A	2OCJA	R175A	1	98	1.57	0.02	0.844	0.73	NA	NA	NA	10713666	NA
p53	R175H	2OCJA	R175H	1	98	9.38	0.19	0.870	3.52	NA	1	2145	10713666	large_intestine,vulva,pleura,peritoneum,endometrium,lung,skin,meninges,kidney,thyroid,cervix,testis,eye,central_nervous_system,oesophagus,NS,upper_aerodigestive_tract,biliary_tract,stomach,soft_tissue,urinary_tract,female_genital_tract_(site_indeterminate),liver,penis,prostate,pancreas,adrenal_gland,salivary_gland,small_intestine,haematopoietic_and_lymphoid_tissue,ovary,bone,breast
p53	C182S	2OCJA	C182S	38	27	-0.60	0.03	0.171	-0.16	NA	Other	8	9843948	salivary_gland,haematopoietic_and_lymphoid_tissue,stomach,soft_tissue,large_intestine
p53	I195T	2OCJA	I195T	7	76	3.06	0.01	0.705	4.12	NA	2	200	10713666	upper_aerodigestive_tract,thyroid,large_intestine,stomach,central_nervous_system,pleura,small_intestine,haematopoietic_and_lymphoid_tissue,liver,biliary_tract,endometrium,urinary_tract,lung,breast,oesophagus,ovary,prostate,pancreas
p53	L201P	2OCJA	L201P	99	36	-0.88	0.03	0.516	-0.35	NA	Other	2	9843948	large_intestine,breast
p53	V203A	2OCJA	V203A	13	13	1.20	0.03	0.142	-0.49	NA	Other	1	9843948	haematopoietic_and_lymphoid_tissue
p53	L206S	2OCJA	L206S	38	26	0.96	0.22	0.476	0.10	NA	NA	NA	9843948	NA
p53	Y220C	2OCJA	Y220C	6	76	3.91	0.00	0.838	3.98	NA	2	641	10713666	peritoneum,vulva,pleura,large_intestine,endometrium,lung,skin,kidney,thyroid,central_nervous_system,oesophagus,NS,upper_aerodigestive_tract,biliary_tract,stomach,soft_tissue,urinary_tract,breast,penis,prostate,pituitary,pancreas,salivary_gland,small_intestine,haematopoietic_and_lymphoid_tissue,ovary,bone,liver
p53	D228E	2OCJA	D228E	71	24	-0.18	0.05	0.130	-0.05	NA	Other	7	9843948	upper_aerodigestive_tract,urinary_tract,ovary,stomach,kidney
p53	I232T	2OCJA	I232T	8	53	2.63	0.56	0.716	3.19	NA	3	23	10713666	upper_aerodigestive_tract,large_intestine,eye,haematopoietic_and_lymphoid_tissue,thymus,biliary_tract,endometrium,oesophagus,breast,lung
p53	Y236F	2OCJA	Y236F	0	25	0.80	0.04	0.179	-0.27	NA	Other	1	9843948	lung
p53	M237I	2OCJA	M237I	4	91	4.48	0.35	0.844	3.18	NA	2	295	10713666	large_intestine,pleura,endometrium,lung,thyroid,cervix,testis,eye,central_nervous_system,oesophagus,NS,upper_aerodigestive_tract,biliary_tract,stomach,soft_tissue,urinary_tract,liver,prostate,pancreas,adrenal_gland,salivary_gland,haematopoietic_and_lymphoid_tissue,thymus,ovary,bone,breast
p53	N239Y	2OCJA	N239Y	26	68	-1.85	0.33	0.851	-1.49	NA	Other	6	9843948	large_intestine,prostate,ovary
p53	C242S	2OCJA	C242S	11	99	6.59	0.08	0.839	3.07	NA	3	55	10713666	upper_aerodigestive_tract,large_intestine,vulva,stomach,soft_tissue,central_nervous_system,pleura,thymus,haematopoietic_and_lymphoid_tissue,breast,endometrium,oesophagus,liver,skin,lung,ovary,kidney,pancreas
p53	G245S	2OCJA	G245S	6	96	4.02	0.00	0.683	1.21	NA	2	708	10713666	large_intestine,vulva,endometrium,lung,skin,kidney,thyroid,cervix,central_nervous_system,oesophagus,NS,upper_aerodigestive_tract,biliary_tract,stomach,soft_tissue,urinary_tract,breast,penis,prostate,pancreas,adrenal_gland,salivary_gland,small_intestine,haematopoietic_and_lymphoid_tissue,ovary,bone,liver
p53	R248Q	2OCJA	R248Q	71	97	0.24	0.16	0.872	1.87	NA	1	1429	10713666	large_intestine,vulva,pleura,peritoneum,endometrium,lung,skin,meninges,kidney,thyroid,cervix,testis,eye,central_nervous_system,genital_tract,oesophagus,NS,upper_aerodigestive_tract,biliary_tract,stomach,soft_tissue,urinary_tract,liver,penis,prostate,pituitary,pancreas,adrenal_gland,salivary_gland,small_intestine,haematopoietic_and_lymphoid_tissue,thymus,ovary,bone,breast
p53	R249S	2OCJA	R249S	15	98	2.79	0.31	0.861	1.92	NA	2	570	10713666	large_intestine,vulva,pleura,endometrium,lung,skin,kidney,thyroid,cervix,central_nervous_system,oesophagus,NS,upper_aerodigestive_tract,biliary_tract,stomach,urinary_tract,liver,prostate,pancreas,salivary_gland,haematopoietic_and_lymphoid_tissue,ovary,bone,breast
p53	I255F	2OCJA	I255F	0	50	3.71	0.06	0.359	3.29	NA	3	46	10713666	upper_aerodigestive_tract,large_intestine,soft_tissue,central_nervous_system,haematopoietic_and_lymphoid_tissue,liver,endometrium,oesophagus,breast,skin,lung,ovary,prostate,pancreas
p53	S260P	2OCJA	S260P	69	29	-1.66	0.06	0.390	0.32	NA	Other	1	9843948	liver
p53	N268D	2OCJA	N268D	12	17	1.55	0.21	0.360	-1.21	NA	NA	NA	10654936	NA
p53	F270C	2OCJA	F270C	1	66	5.06	0.02	0.854	4.54	NA	3	31	10713666	upper_aerodigestive_tract,large_intestine,urinary_tract,lung,breast,oesophagus,ovary,prostate,liver
p53	R273H	2OCJA	R273H	28	92	-0.11	0.05	0.875	0.45	NA	1	1332	10713666	large_intestine,vulva,pleura,peritoneum,endometrium,lung,skin,kidney,thyroid,cervix,testis,central_nervous_system,genital_tract,oesophagus,parathyroid,NS,upper_aerodigestive_tract,biliary_tract,stomach,soft_tissue,fallopian_tube,urinary_tract,breast,penis,prostate,pancreas,adrenal_gland,salivary_gland,haematopoietic_and_lymphoid_tissue,thymus,ovary,bone,liver
p53	R282W	2OCJA	R282W	15	90	7.07	1.05	0.846	3.30	NA	2	998	10713666	large_intestine,vulva,pleura,peritoneum,endometrium,lung,skin,kidney,thyroid,cervix,testis,central_nervous_system,oesophagus,NS,upper_aerodigestive_tract,biliary_tract,stomach,soft_tissue,urinary_tract,liver,penis,prostate,pancreas,adrenal_gland,salivary_gland,small_intestine,haematopoietic_and_lymphoid_tissue,thymus,ovary,bone,breast
p53	E326A	3SAKA	E8A	81	75	0.72	0.10	0.636	0.4	NA	NA	NA	10048932	NA
p53	E326G	3SAKA	E8G	81	75	1.71	0.09	0.641	0.20	-0.53	NA	NA	20978130	NA
p53	Y327D	3SAKA	Y9D	80	28	1.96	0.14	0.677	1.53	-3.95	Other	1	20978130	large_intestine
p53	Y327H	3SAKA	Y9H	80	28	2.24	0.31	0.277	0.75	-1.80	NA	NA	20978130	NA
p53	Y327S	3SAKA	Y9S	80	28	2.15	0.17	0.302	1.02	-3.00	NA	NA	20978130	NA
p53	F328A	3SAKA	F10A	84	64	2.41	0.01	0.701	1.8	NA	NA	NA	10048932	NA
p53	F328L	3SAKA	F10L	84	64	0.11	0.01	0.441	1.12	-3.48	NA	NA	20978130	NA
p53	F328S	3SAKA	F10S	84	64	1.37	0.01	0.703	2.38	-7.13	Other	1	20978130	large_intestine
p53	F328V	3SAKA	F10V	84	64	1.45	0.01	0.721	3.20	-7.08	Other	1	20978130	stomach
p53	T329A	3SAKA	T11A	100	57	0.02	0.00	0.612	0.9	NA	NA	NA	10048932	NA
p53	T329I	3SAKA	T11I	100	57	-0.85	0.04	0.522	-0.42	1.20	Other	3	20978130	upper_aerodigestive_tract,central_nervous_system,skin
p53	L330H	3SAKA	L12H	82	79	2.71	0.15	0.835	4.70	-10.30	Other	7	20978130	ovary,oesophagus,liver,skin
p53	Q331A	3SAKA	Q13A	96	33	1.53	0.01	0.335	0.35	NA	NA	NA	10048932	NA
p53	Q331H	3SAKA	Q13H	96	33	1.03	0.26	0.315	-0.02	0.05	Other	25	20978130	upper_aerodigestive_tract,salivary_gland,liver,haematopoietic_and_lymphoid_tissue,large_intestine,endometrium,urinary_tract,oesophagus,breast,lung,ovary,pancreas
p53	Q331P	3SAKA	Q13P	96	33	0.46	0.01	0.336	0.85	-2.05	Other	3	20978130	oesophagus
p53	Q331R	3SAKA	Q13R	96	33	-0.62	0.09	0.347	-0.47	1.08	Other	2	20978130	large_intestine
p53	I332V	3SAKA	I14V	27	46	1.19	0.00	0.126	0.05	-0.13	Other	1	20978130	ovary
p53	R333A	3SAKA	R15A	84	82	0.81	0.13	0.716	0.975	NA	NA	NA	10048932	NA
p53	G334V	3SAKA	G16V	51	98	4.86	0.48	0.772	2.05	-4.63	Other	21	20978130	upper_aerodigestive_tract,stomach,endometrium,lung,breast,NS,liver
p53	G334W	3SAKA	G16W	51	98	3.63	0.17	0.833	1.45	-3.85	Other	10	20978130	biliary_tract,stomach,salivary_gland,lung,liver,parathyroid
p53	R335A	3SAKA	R17A	81	86	0.13	0.06	0.722	0.525	NA	NA	NA	10048932	NA
p53	R335G	3SAKA	R17G	81	86	1.00	0.02	0.754	2.05	-5.55	NA	NA	20978130	NA
p53	R335H	3SAKA	R17H	81	86	-0.27	0.12	0.741	1.02	-2.65	NA	NA	20978130	NA
p53	R335L	3SAKA	R17L	81	86	-0.92	0.08	0.762	0.45	-1.08	Other	2	20978130	upper_aerodigestive_tract
p53	E336A	3SAKA	E18A	87	71	1.29	0.01	0.581	-0.75	NA	NA	NA	10048932	NA
p53	R337A	3SAKA	R19A	51	38	2.15	0.01	0.354	2325	NA	NA	NA	10048932	NA
p53	R337C	3SAKA	R19C	51	38	2.32	0.01	0.741	5.15	-11.70	3	144	20978130	large_intestine,vulva,peritoneum,endometrium,lung,skin,kidney,thyroid,central_nervous_system,oesophagus,NS,upper_aerodigestive_tract,biliary_tract,stomach,soft_tissue,liver,penis,prostate,pancreas,adrenal_gland,salivary_gland,haematopoietic_and_lymphoid_tissue,ovary,breast
p53	R337H	3SAKA	R19H	51	38	1.40	0.01	0.476	3.30	-7.88	3	85	20978130	thyroid,adrenal_gland,large_intestine,autonomic_ganglia,cervix,haematopoietic_and_lymphoid_tissue,liver,parathyroid,skin,meninges,prostate,kidney,pancreas
p53	R337L	3SAKA	R19L	51	38	-0.03	0.02	0.715	2.65	-7.70	2	54	20978130	upper_aerodigestive_tract,large_intestine,soft_tissue,small_intestine,haematopoietic_and_lymphoid_tissue,biliary_tract,urinary_tract,lung,breast,penis,oesophagus,pancreas,prostate,bone,kidney,liver
p53	F338A	3SAKA	F20A	52	42	2.56	0.01	0.728	1.8	NA	NA	NA	10048932	NA
p53	F338I	3SAKA	F20I	52	42	2.91	0.18	0.730	3.02	-7.90	Other	2	20978130	breast,kidney
p53	F338L	3SAKA	F20L	52	42	0.61	0.07	0.705	1.55	-4.28	Other	1	20978130	stomach
p53	E339A	3SAKA	E21A	40	85	0.33	0.01	0.638	0.45	NA	NA	NA	10048932	NA
p53	E339K	3SAKA	E21K	40	85	0.21	0.03	0.649	0.10	-0.25	Other	4	20978130	upper_aerodigestive_tract,large_intestine,pancreas
p53	M340A	3SAKA	M22A	52	47	2.97	0.04	0.559	1.6	NA	NA	NA	10048932	NA
p53	F341C	3SAKA	F23C	42	26	4.30	0.33	0.728	3.85	-11.15	Other	2	20978130	prostate,pleura
p53	R342A	3SAKA	R24A	46	27	0.03	0.00	0.291	0.35	NA	NA	NA	10048932	NA
p53	R342L	3SAKA	R24L	46	27	-1.48	0.03	0.335	0.62	-1.50	NA	NA	20978130	NA
p53	R342Q	3SAKA	R24Q	46	27	-0.19	0.04	0.283	0.65	-1.58	Other	3	20978130	upper_aerodigestive_tract,stomach
p53	E343A	3SAKA	E25A	70	25	0.29	0.03	0.360	0.275	NA	NA	NA	10048932	NA
p53	E343G	3SAKA	E25G	70	25	1.29	0.02	0.396	1.02	-2.63	NA	NA	20978130	NA
p53	L344R	3SAKA	L26R	59	43	2.69	0.08	0.757	2.25	-7.35	Other	6	20978130	urinary_tract,biliary_tract,lung,breast
p53	N345A	3SAKA	N27A	52	42	-0.93	0.04	0.275	0.925	NA	NA	NA	10048932	NA
p53	E346A	3SAKA	E28A	54	62	0.18	0.01	0.535	0.42	-1.05	Other	1	20978130	upper_aerodigestive_tract
p53	A347G	3SAKA	A29G	50	37	2.05	0.01	0.293	1.10	-3.28	Other	1	20978130	central_nervous_system
p53	A347T	3SAKA	A29T	50	37	2.83	0.93	0.320	1.55	-6.03	Other	7	20978130	large_intestine,breast,central_nervous_system
p53	L348F	3SAKA	L30F	66	94	0.43	0.62	0.370	1.42	-3.35	Other	5	20978130	ovary,lung,liver
p53	L348S	3SAKA	L30S	66	94	2.80	0.13	0.702	3.07	-8.95	Other	2	20978130	upper_aerodigestive_tract,soft_tissue
p53	E349A	3SAKA	E31A	57	91	0.36	0.20	0.658	0.95	NA	NA	NA	10048932	NA
p53	E349D	3SAKA	E31D	57	91	0.71	0.20	0.316	1.02	-3.53	NA	NA	20978130	NA
p53	L350A	3SAKA	L32A	74	87	1.17	0.07	0.359	0.525	NA	NA	NA	10048932	NA
p53	K351A	3SAKA	K33A	70	43	0.86	0.07	0.132	-0.625	NA	NA	NA	10048932	NA
p53	D352A	3SAKA	D34A	61	59	-0.29	0.28	0.339	0.55	NA	NA	NA	10048932	NA
p53	A353T	3SAKA	A35T	72	56	0.01	0.00	0.139	0.52	-1.35	Other	1	20978130	urinary_tract
p53	Q354K	3SAKA	Q36K	72	45	-0.90	0.03	0.260	0.38	-1.08	Other	1	20978130	upper_aerodigestive_tract
p53	Q354R	3SAKA	Q36R	72	45	-0.72	0.05	0.103	0.15	-0.43	Other	2	20978130	breast,kidney
p53	G356A	3SAKA	G38A	81	29	0.21	0.00	0.065	-0.22	0.48	NA	NA	20978130	NA
p53	G356W	3SAKA	G38W	81	29	0.57	0.04	0.318	-0.02	0.03	Other	2	20978130	vulva,endometrium
# LEGEND
# PROT: protein ID
# SMUT: Mutation in the protein sequence
# PDB: PDB ID and cha
# MUT: Mutation in the PDB
# RSA: relative solvent accessibility of the wild-type residue
# FWT: Frequency of the wild-type residue in the multipl sequence alignment
# FOLDX: Predicted variation of folding free energy (DDG) with FoldX in kcal/mol
# STDEV: Standard deviation of the predicted DDG
# METASNP: The probability of pathogenicity returned by Meta-SNP
# DDG: Experimental folding free energy in kcal/mol
# DTm: Experimental variation of the melting temperature
# CMC: Annotation on the Cancer Mutation Census
# CMS: Number of mutated tissue samples in COSMIC database
# PMID: Publication identifier reporting the experimental data
# TISSUE: Tuumor tissues in which the mutations are detected
